# Supplementary material
Source: PubMed Central journal article supplement (PMC9216666)
Supplement: mmc10.pdf [file mmc10.pdf]

## AUTHORSHIP AGREEMENT

All requests for authorship changes after submission of a manuscript to *IJREGI* should be made to the Editorial Office. This form must be completed for any authorship changes including adding new authors, removing existing authors, reordering existing authors, or adjusting equal contributor status. The corresponding author must confirm that all authors meet the criteria for authorship as outlined by the Committee on Publication Ethics (COPE) and that all authors agree to the change. All authors who have been added, removed, or reordered need to confirm that they agree to the change by signing the form. Please complete and return this form. The relevant submission will be put on hold and no further processing can occur until the editorial office receives the completed form.

**Manuscript number: IJREGI-D-21-00101**

**Manuscript title: Seroprevalence of anti-SARS-CoV-2 antibodies in Senegal: a national population-based cross-sectional survey, between October and November 2020**

**Would you like to change the authorship of your paper?** (Please tick one of the following):

- Yes (please fill in box below with all necessary signatures):

**The nature of change(s) in authorship** (Please check one of the following):

- Change de Corresponding Author:
- Add new author(s);
- Remove existing author(s);
- Change the order of authorship;
- Others (please specify): Contribution as co-authors

**Detailed reason for the change:**

A statistical engineer who has worked widely in data analysis, we forgot to mention her name among the authors in the first submission.

Dr Ousmane FAYE and Dr Inès VIGAN-WOMAS have contributed equally as co-last senior authors to this work: conception, methodology, supervision, coordination, data curation, data analysis, validation of the underlying data and writing of the manuscript.

**Indicate the specific change:**

**Adding a new author**

|                              |                           |
|------------------------------|---------------------------|
| <b>Name</b>                  | Mareme Seye Thiam         |
| <b>Email address</b>         | Mareme.THIAM@pasteur.sn   |
| <b>Institution</b>           | Institut Pasteur de Dakar |
| <b>Specific contribution</b> | Data analysis             |

**Removing an existing author**

|                      |  |
|----------------------|--|
| <b>Name</b>          |  |
| <b>Email address</b> |  |

|                                 |  |
|---------------------------------|--|
| <b>Institution</b>              |  |
| <b>Agree to be acknowledged</b> |  |

**Complete author order AFTER change (please note any authors with equal contribution as first authors or corresponding authors)**

| Order | Author name BEFORE change | Author name AFTER change | Signature                                                                             |
|-------|---------------------------|--------------------------|---------------------------------------------------------------------------------------|
| 1     | Cheikh Talla              | Cheikh Talla             |    |
| 2     | Cheikh Loucoubar          | Cheikh Loucoubar         |    |
| 3     | Jerlie Loko Roka          | Jerlie Loko Roka         |    |
| 4     | Mamadou A. Barry          | Mamadou A. Barry         |    |
| 5     | Seynabou Ndiaye           | Seynabou Ndiaye          |   |
| 6     | Maryam Diarra             | Maryam Diarra            |  |
| 7     |                           | Mareme Seye Thiam        |  |
| 8     | Oumar Faye                | Oumar Faye               |  |
| 9     | Moussa Dia                | Moussa Dia               |  |
| 10    | Mamadou Diop              | Mamadou Diop             |  |
| 11    | Oumar Ndiaye              | Oumar Ndiaye             |  |
| 12    | Adama Tall                | Adama Tall               |  |
| 13    | Rokhaya Faye              | Rokhaya Faye             |  |
| 14    | Adji Astou Mbow           | Adji Astou Mbow          |  |

|    |                       |                               |                                                                                                                                                                                                       |
|----|-----------------------|-------------------------------|-------------------------------------------------------------------------------------------------------------------------------------------------------------------------------------------------------|
| 15 | Babacar Diouf         | Babacar Diouf                 |                                                                                                                    |
| 16 | Jean Pierre Diallo    | Jean Pierre Diallo            |                                                                                                                    |
| 17 | Ibrahima Mamby Keita  | Ibrahima Mamby Keita          |                                                                                                                    |
| 18 | Mamadou Ndiaye        | Mamadou Ndiaye                |                                                                                                                    |
| 19 | Tom Woudenberg        | Tom Woudenberg                |                                                                                                                    |
| 20 | Michael White         | Michael White                 | Michael White                                                                                                                                                                                         |
| 21 | Ting, Jim             | Ting, Jim                     | Jim Ting                                                                                                                                                                                              |
| 22 | Cheikh Tidiane Diagne | Cheikh Tidiane Diagne         |                                                                                                                  |
| 23 | Omer Pasi             | Omer G. Pasi                  |                                                                                                                  |
| 24 | Boly Diop             | Boly Diop                     |                                                                                                                  |
| 25 | Amadou A. Sall        | Amadou A. Sall                | <br>Dr Amadou Alpha SALL<br>Administrateur Général<br>INSTITUT PASTEUR DE DAKAR                                  |
| 26 | Inès Vigan-Womas      | Inès Vigan-Womas <sup>#</sup> | <br>Dr Inès VIGAN-WOMAS<br>Pôle Immunophysio-pathologie<br>et Maladies Infectieuses<br>INSTITUT PASTEUR DE DAKAR |
| 27 | Ousmane Faye          | Ousmane Faye <sup>#</sup>     | <br>Dr Ousmane FAYE<br>Responsable du Pôle de Virologie<br>INSTITUT PASTEUR DE DAKAR                             |

# Contributed equally to this work as co-last senior authors

Approval of the final version of the manuscript to be submitted, all authors must sign the table above to indicate agreement with the altered authorship (all authors must be listed, full name in print and signatures are needed from all).
